# Supplementary material for: Enhanced cell membrane enrichment and subsequent cellular internalization of quantum dots via cell surface engineering: illuminating plasma membranes with quantum dots
Source: Royal Society of Chemistry journal article supplement (doi:10.1039/c5tb02183a), 2015-12-21
Supplement: c5tb02183a1.pdf [file c5tb02183a1.pdf]

## Electronic Supplementary Information

### Enhanced cell membrane enrichment and subsequent cellular internalization of quantum dots via cell surface engineering: illuminating plasma membranes with quantum dots

Hong-Yin Wang,<sup>a</sup> Xian-Wu Hua,<sup>a</sup> Hao-Ran Jia,<sup>a</sup> Peidang Liu,<sup>a,c</sup> Ning Gu,<sup>a</sup> Zhan Chen<sup>b</sup> and Fu-Gen Wu<sup>\*a</sup>

<sup>a</sup>State Key Laboratory of Bioelectronics, School of Biological Science and Medical Engineering, Southeast University, Nanjing 210096, P. R. China. E-mail: wufg@seu.edu.cn

<sup>b</sup>Department of Chemistry, University of Michigan, 930 North University Avenue, Ann Arbor, Michigan 48109, United States

<sup>c</sup>School of Medicine, Southeast University, Nanjing 210009, P. R. China

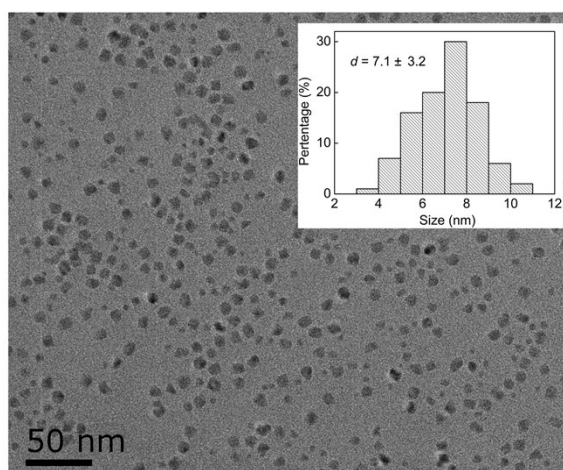

**Fig. S1** TEM image of QDs-avidin (0.3 mM). The diameter of QDs-avidin is ~7 nm with a narrow size distribution.

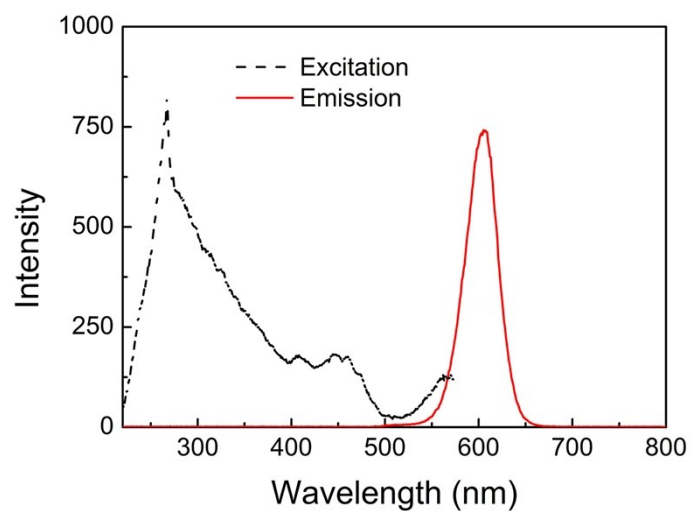

**Fig. S2** Fluorescence spectra of QDs-avidin (1 nM). The maximum emission wavelength of QDs-avidin is 605 nm, while the excitation wavelength locates from 200 to 500 nm.

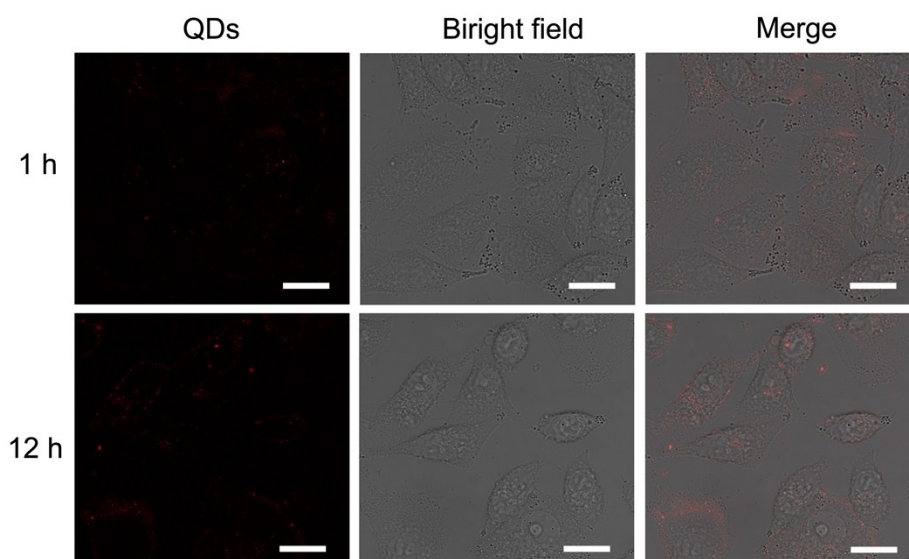

**Fig. S3** Confocal fluorescence images of A549 cells incubated with QDs-avidin (20 nM) in the absence of cell surface engineering reagent for 1 and 12 h, respectively. Scale bars are 20  $\mu\text{m}$ .

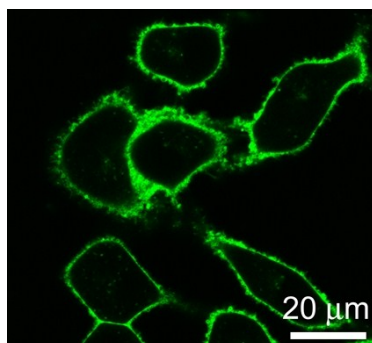

**Fig. S4** Confocal fluorescence image of A549 cells incubated with cholesterol-PEG2k-FITC (10 µg/mL) at 37°C for 1 h.

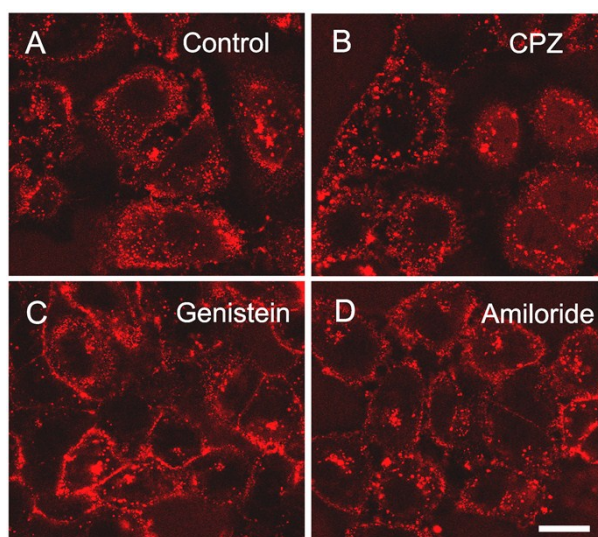

**Fig. S5** Confocal fluorescence images demonstrating the internalization of QDs within A549 cells after incubating without (A) or with various endocytosis inhibitors such as (B) chlorpromazine (CPZ, 5 µg/mL), inhibitor of clathrin-mediated endocytosis, (C) genistein (50 µg/mL), inhibitor of caveolae-mediated endocytosis and (D) amiloride (10 µg/mL), inhibitor of macropinocytosis. Scale bar is 20 µm.

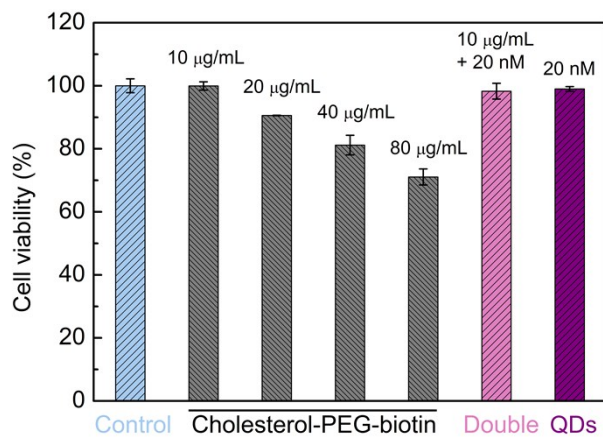

**Fig. S6** Cell viability of A549 cells after incubation with different reagents for 24 h.

“Double” means “cholesterol-PEG2k-biotin (10 µg/mL) and QDs-avidin (20 nM)”.

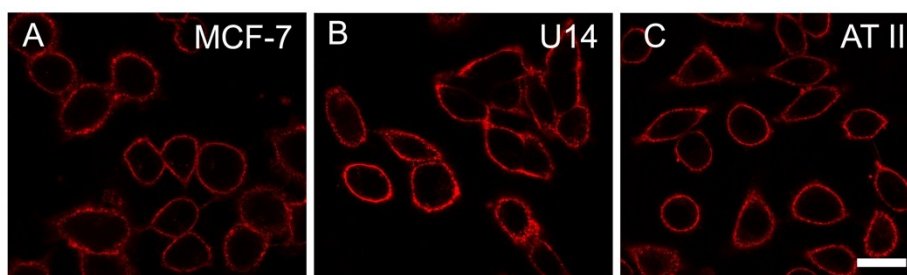

**Fig. S7** Confocal fluorescence images of MCF-7 (A), U14 (B) and AT II cells (C) after treating the cells with cholesterol-PEG2k-biotin (10 µg/mL) and QDs-avidin (20 nM). Scale bar is 20 µm.
